# Supplementary material for: Graphene oxide fiber microelectrodes with controlled sheet alignment for sensitive neurotransmitter detection
Source: Royal Society of Chemistry journal article supplement (doi:10.1039/d3nr02879h), 2023-01-01
Supplement: d3nr02879h1.pdf [file d3nr02879h1.pdf]

## **Graphene Oxide Fiber Microelectrodes with Controlled Sheet Alignments for Sensitive Neurotransmitter Detection**

Romana Jarosova<sup>1,2</sup>, Blaise J. Ostertag<sup>1</sup>, and Ashley E. Ross<sup>1,3</sup>

<sup>1</sup>University of Cincinnati  
Department of Chemistry  
312 College Dr.  
404 Crosley Tower  
Cincinnati, OH 45221-0172

<sup>2</sup>Department of Analytical Chemistry  
UNESCO Laboratory of Environmental Electrochemistry  
Charles University  
Prague 2, Czech Republic 12843

Office #: 513-556-9314  
Email: [Ashley.ross@uc.edu](mailto:Ashley.ross@uc.edu)

<sup>3</sup>Corresponding author

### **Table of Contents**

S-2. Abstract of included materials

S-3. Supporting Methods

S-4. Tensile strength measurements (Figure S-1)

**Abstract of included materials:**

Here, we present two methods for synthesizing graphene oxide (GO) fiber microelectrodes allowing for controllable nanosheet orientation and characterized how this nanosheet orientation impacts both the microelectrode morphological properties and electrochemical performance. The Supporting Information and Supporting Figures for the manuscript consist of methods for acquiring tensile strength measurements to investigate fiber mechanical properties.

## **Supporting Methods**

### ***Surface Characterization – Tensile Strength Measurements***

A TestResources 100N250-10 100 Series frame and actuator assembly (Shakopee, MN, USA) was used to acquire tensile strength information for aligned and misaligned graphene oxide fibers with a Newton controller atop a PWA090 electronic, self-leveling benchtop isolation system from ThorLabs (Newton, NJ, USA).

### Supporting Figure

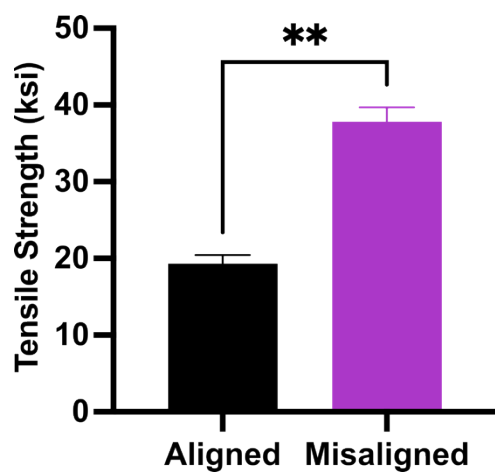

**Figure S-1.** The  $\pi$ - $\pi$  interactions of misaligned GO sheets perpendicular to the fiber's length provide a tensile strength of  $37.8 \pm 1.9$  ksi, much greater than that of parallel aligned GO sheets with a tensile strength of  $19.3 \pm 1.1$  ksi (Unpaired t-test,  $p = 0.0011$ ,  $n = 3$ ).
